# Supplementary material for: Investigation of Precise Molecular Mechanistic Action of Tobacco-Associated Carcinogen ‘NNK’ Induced Carcinogenesis: A System Biology Approach
Source: PubMed Central journal article supplement (PMC6723528; doi:10.3390/genes10080564), 2019-07-26
Supplement: genes-10-00564-s001.pdf [file genes-10-00564-s001.pdf]

The supplementary figure 1, depicts the genes involved in various subgraphs.

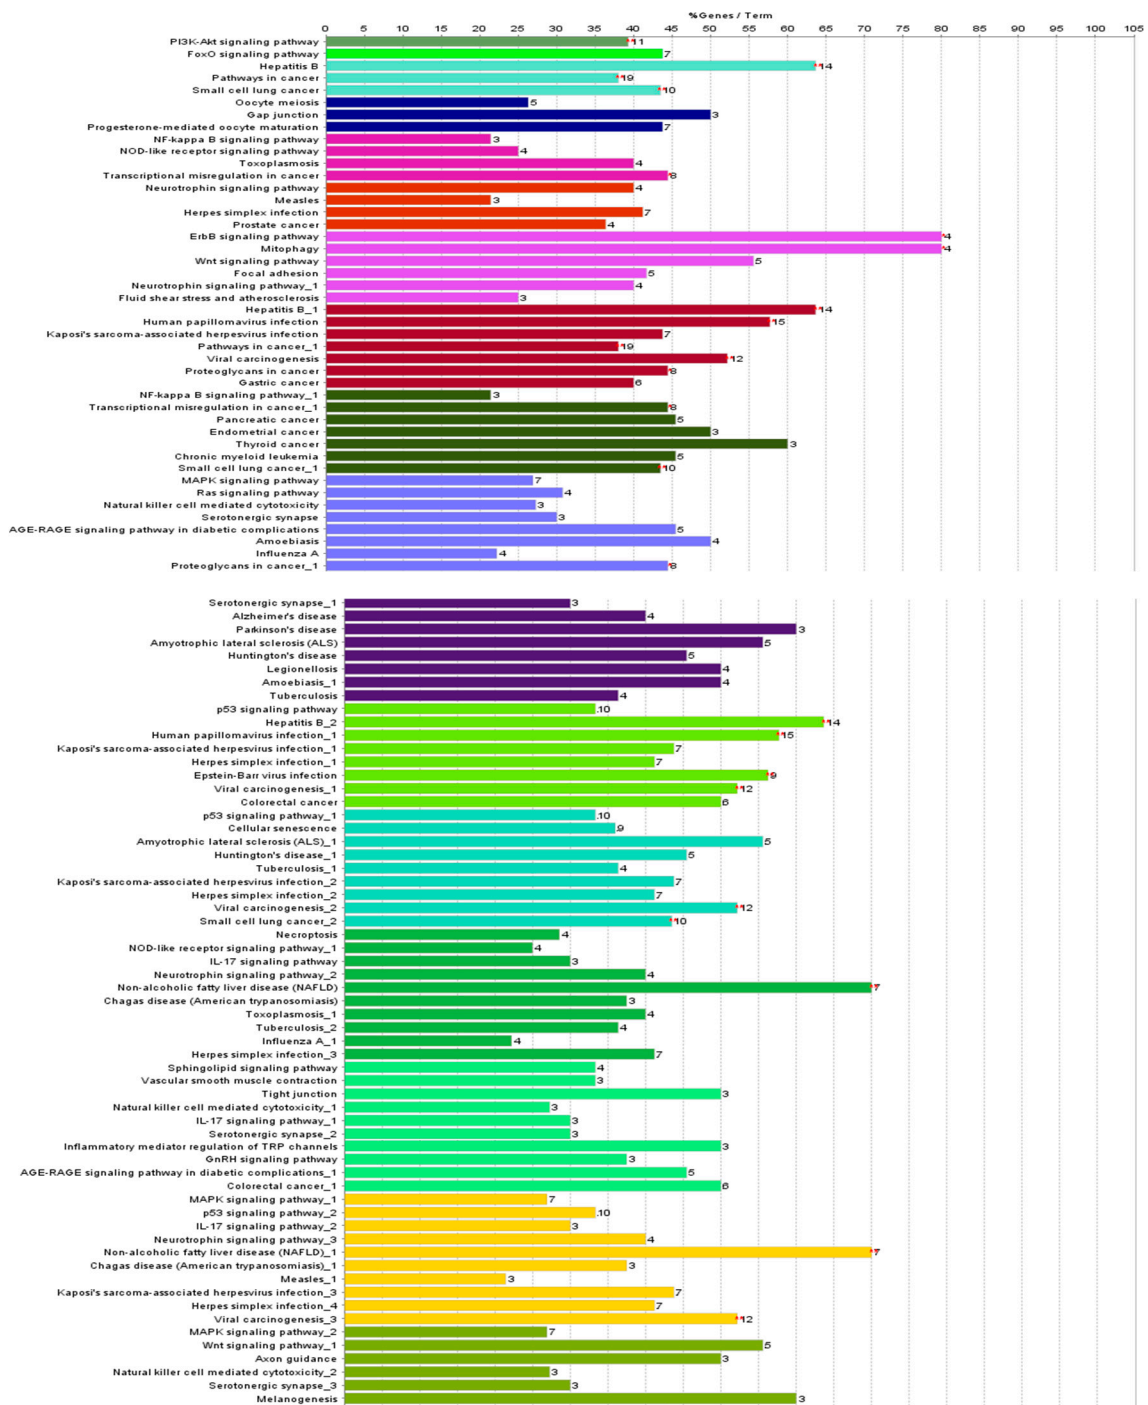

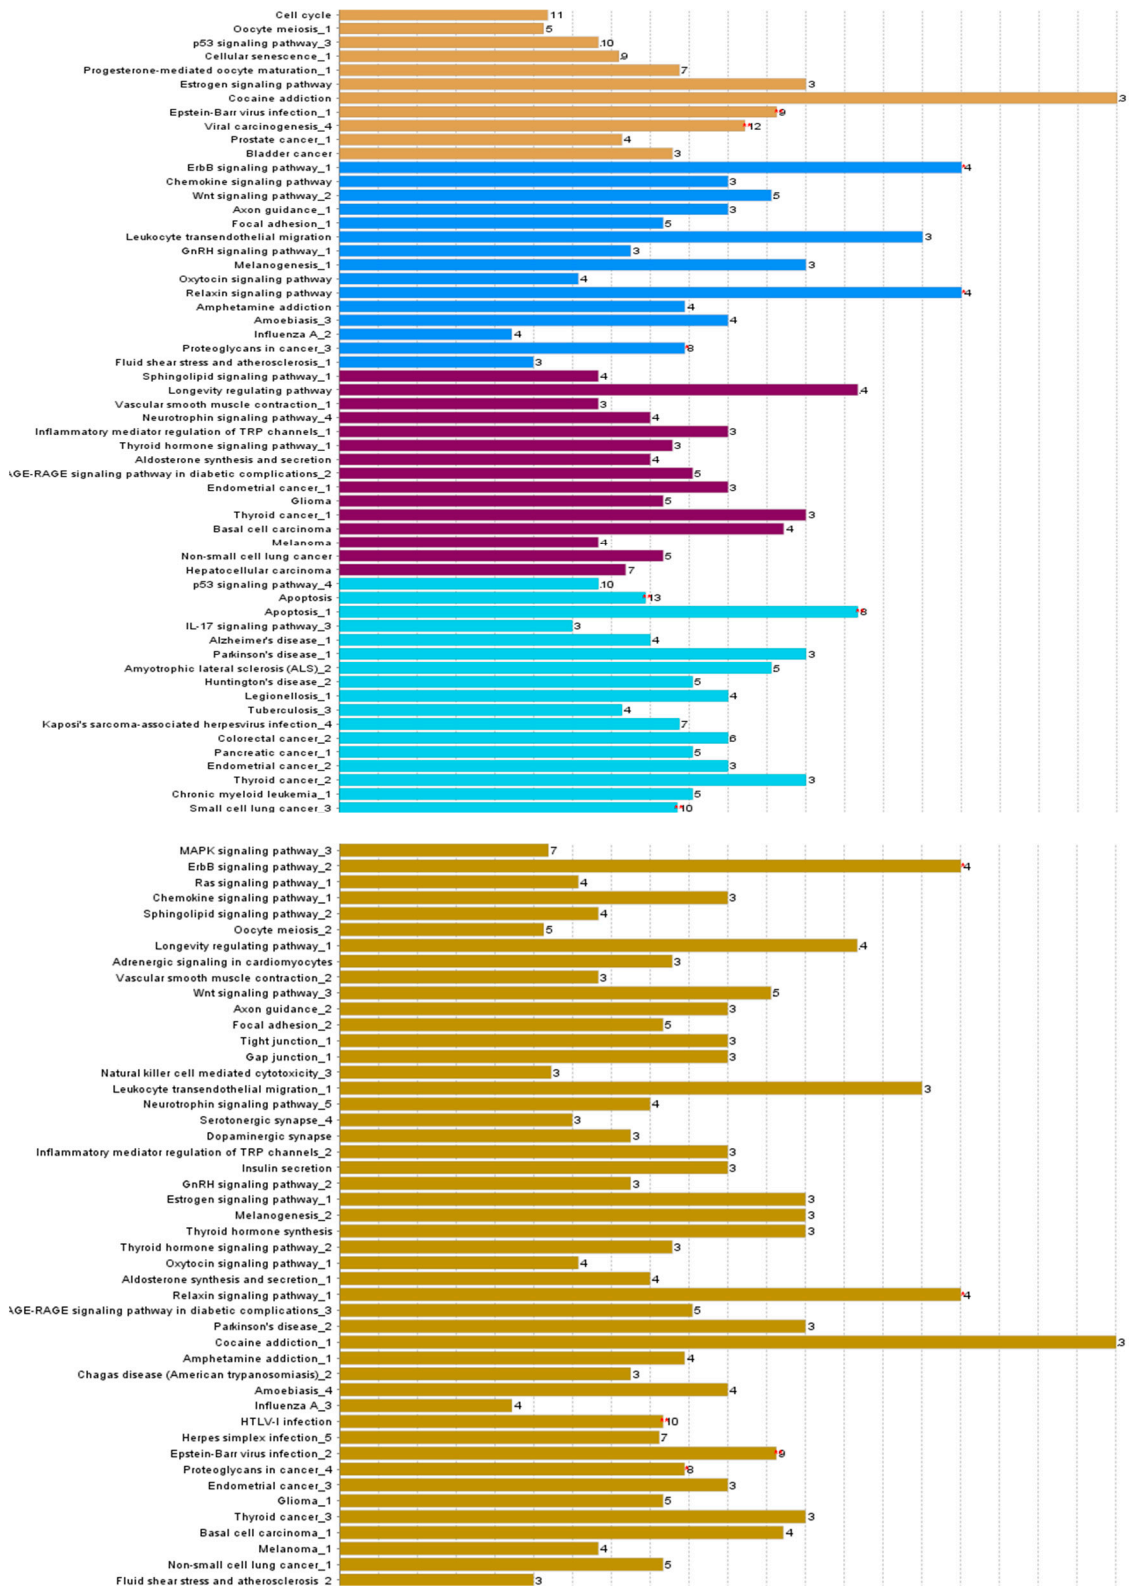

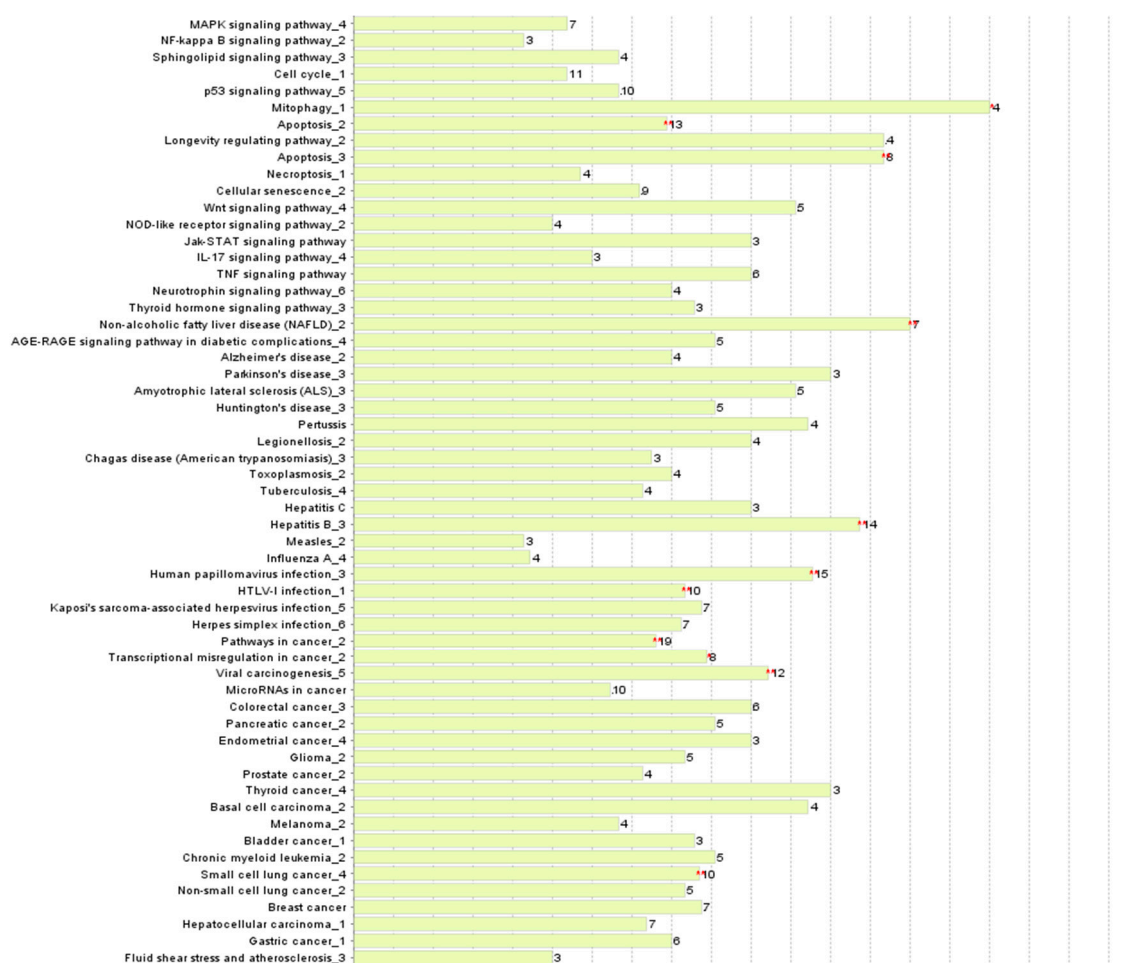

**Supplementary Figure 1: Graph of GO enriched pathways depicting the involvement of genes under various sub-graphs.** The x-axis showing the percent (%) of genes/biomolecules against pathway term and the y-axis depicting the various pathways that have got enriched. Same colored bars depict a group.
